# Supplementary material
Source: PubMed Central journal article supplement (PMC3268439)

## **SUPPLEMENTARY MATERIAL**

### **Supplementary Figure Legends**

**Fig S1.** Western blot analysis of cytosolic, nuclear and mitochondrial extracts from HEK293 cells stably expressing NEIL2-FLAG. RNAP II, LDH and 70kDa subunit of complex II (C II-70kDa) were used as nuclear, cytosolic and mt markers, respectively, to show the purity of mt preparations. Lysed cytosolic, nuclear and mitochondrial fractions were loaded in equal amount (30 µg).

Fig S1

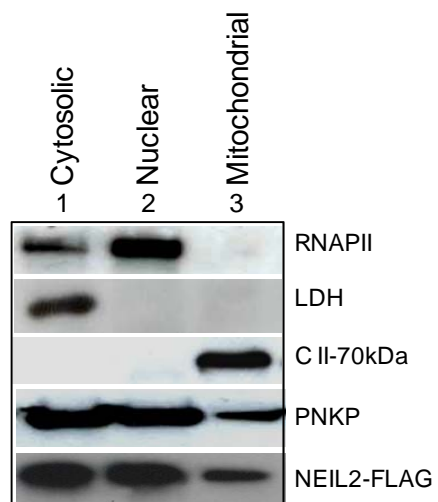

Supplement: supp_M111.272179_jbc.M111.272179-1.pdf [file supp_M111.272179_jbc.M111.272179-1.pdf]
